# Supplementary material for: Completeness of patient-held records: observations of the Road-to-Health Booklet from two national facility-based surveys at 6 weeks postpartum, South Africa
Source: PubMed Central journal article supplement (PMC6189547; doi:10.7189/jogh.08.020901), 2018-12
Supplement: jogh-08-020901-s001.pdf [file jogh-08-020901-s001.pdf]

## Online Supplementary Document

Ramraj et al. Completeness of patient-held records: observations of the Road-to-Health Booklet from two national facility-based surveys at 6 weeks postpartum, South Africa

J Glob Health 2018;8:020901

Supplementary Table S1: Brant Test for the Parallel Regression Assumption of Proportionality of odds in the 2011-12 and 2012-13 surveys, South Africa

| Variable                                    | 2011-12 and 2012-13 surveys |         |
|---------------------------------------------|-----------------------------|---------|
|                                             | Chi-square                  | P-value |
| Survey year                                 | 40.24                       | <0.0001 |
| Mother's education                          | 0.41                        | 0.939   |
| Marital status                              | 0.61                        | 0.895   |
| Parity                                      | 2.14                        | 0.544   |
| Correct knowledge of MTCT modes             | ~                           | ~       |
| SES                                         | 39.76                       | <0.000  |
| TB screening during pregnancy               | 13.22                       | 0.004   |
| Infant feeding counselling during pregnancy | 24.6                        | <0.0001 |
| Place of delivery                           | 27.05                       | <0.0001 |
| Birth attendant                             | 2.62                        | 0.454   |
| Province                                    | 32.02                       | <0.0001 |

**Survey year** - variable violates the proportional odds assumption hence not constrained in analyses. ~ not in the final model
